## **Title**

Patient-Perceived Facilitators and Barriers to Home-Based Rehabilitation Exercise and General Physical Activity after Total Hip Arthroplasty

## **Corresponding author**

Janni Dahlgaard Gravesen, RN, MSc  
Silkeborg Regional Hospital, Research Unit, Elective Surgery Centre, Denmark  
[dgjanni@gmail.com](mailto:dgjanni@gmail.com) Phone +45 24 67 65 67

Merete Nørgaard Madsen, PT, MSc  
Silkeborg Regional Hospital, Research Unit, Elective Surgery Centre, Denmark  
[Merete.madsen@midt.rm.dk](mailto:Merete.madsen@midt.rm.dk)

Lone Ramer Mikkelsen, Associate Professor, PhD.  
Silkeborg Regional Hospital, Research Unit, Elective Surgery Centre, Denmark  
[lonemike@rm.dk](mailto:lonemike@rm.dk)

Thomas Bandholm, PT, PhD. Professor  
Copenhagen University Hospital, Amager and Hvidovre, Physical Medicine & Rehabilitation Research – Copenhagen (PMR-C), Department of Physical and Occupational Therapy, Clinical Research Center and Department of Orthopedic Surgery, Copenhagen, Denmark  
[thomas.quaade.bandholm@regionh.dk](mailto:thomas.quaade.bandholm@regionh.dk)

Anne Grøndahl Poulsen, PT, MSc  
Silkeborg Regional Hospital, Research Unit, Elective Surgery Centre, Denmark  
[groendahlanne@hotmail.com](mailto:groendahlanne@hotmail.com)

Camilla Blach Rossen, RN, MSc, PhD.  
Silkeborg Regional Hospital, Research Unit, Elective Surgery Centre, Denmark  
[caross@rm.dk](mailto:caross@rm.dk)

## Abstract

**Background.** Recent systematic reviews suggest that outpatient supervised and home-based rehabilitation exercise after total hip arthroplasty (THA) are equally effective. But there is a lack of knowledge concerning patients' perspectives on rehabilitation after THA.

**Objectives.** To explore patient-perceived facilitators and barriers to home-based rehabilitation exercise and general physical activity after THA. The aim of this study is to contribute to the scientific basis for future organization of rehabilitation after THA.

**Design.** A qualitative study embedded in the trial: Pragmatic Home-based Exercise after Total Hip Arthroplasty – Silkeborg (PHETHAS-1), which was pre-registered on March 27, 2017 at Clinical Trials.gov (ID:NCT03109821).

**Methods.** Twenty-two semi-structured individual interviews were conducted with patients who had undergone THA surgery. Thematic analysis was undertaken, and emergent themes and subthemes were categorized using the lens of critical psychology.

**Findings.** Facilitating factors were related to “Return to the well-known everyday life,” “A natural orientation toward general physical activity,” “Interaction with nature,” and “An obligation to health professionals and to oneself.” Barriers were related to “Pain,” “Boring exercises,” and, “A feeling of distant rehabilitation.”

**Conclusions.** Our findings indicate that everyday life is of great importance to the participants and that they have a desire to return to living the way they did before their hips restricted their functioning. Home-based rehabilitation exercise can be used as a means to reach this goal. Contact with health professionals has a beneficial impact on participants' adherence to home-based rehabilitation exercise because their participation is facilitating by being a part of a mandatory co-

operation. All participants in this study favored general physical activity over home-based rehabilitation exercise.

## Introduction

Yearly, around 11,000 total hip arthroplasties (THA) are performed in Denmark.<sup>1</sup> The clinical pathway for patients undergoing THA has changed during the past decades. Fast-track surgery has proven effective in terms of reducing length of hospital stay, morbidity, and convalescence.<sup>2</sup> Today, fast-track surgical programs for THA have been widely implemented in Denmark, and patients are routinely discharged from the hospital within 2 days of surgery.<sup>3</sup>

In Denmark, it is recommended that patients undergoing THA perform rehabilitation exercises as part of the post-operative program. In some hospitals, the standard procedure is to refer patients to supervised rehabilitation exercise in the municipality, while in other hospitals a home-based rehabilitation exercise program is offered. After the initial instruction, there is no supervision of patients in the home-based program.<sup>4</sup>

The most recent systematic review on supervised exercise after THA shows that it provides no significant additional benefit compared to non-supervised home-based exercise with regard to patient-reported function, pain, health-related quality of life, and performance-based functions.<sup>4</sup>

This is supported by a previous systematic review with a meta-analysis of randomized trials.<sup>5</sup>

To be able to support and optimize a clinical pathway in which patients undertake rehabilitation exercise at home after a THA, we need to know what these patients perceive as facilitators of and barriers to home-based rehabilitation exercise and physical activity in general. The latest systematic review of patients' perceptions of physical activity before and after THA shows that patients' overall goal is to return to their pre-pathological activity status after hip replacement surgery.<sup>6</sup>

A randomized controlled trial shows that home-based rehabilitation exercise is effective, but adherence to it may be a problem.<sup>7</sup> This is consistent with studies from other disciplines showing that people often modify the recommendations they receive from professionals in order to adapt the recommendations to their individual everyday lives.<sup>8</sup>

The aim of this study was to explore patient-perceived facilitators and barriers to home-based rehabilitation exercise (HBRE) and general physical activity (PA) after THA.

We define HBRE as a regimen or plan of physical activities designed and prescribed to meet specific therapeutic goals. Its purpose is to restore normal musculoskeletal function or to reduce pain caused by diseases or injuries. This definition is synonymous with the MeSH term “Exercise therapy” as defined in the PubMed MeSH database.<sup>9</sup> We define general PA as any bodily movement produced by skeletal muscles that requires energy expenditure – including activities undertaken while working, playing, carrying out household chores, travelling, and engaging in recreational pursuits. The term "physical activity" should not be confused with "exercise", which is a subcategory of physical activity that is planned, structured, and repetitive. This definition is synonymous with the World Health Organization’s definition of physical activity.<sup>10</sup>

## **Method**

### **Study design**

The study was designed within a qualitative paradigm and applied a thematic analysis.

The study was part of the trial: Pragmatic Home-based Exercise after Total Hip Arthroplasty – Silkeborg (PHETHAS-1), which investigated the preliminary efficacy of home-based rehabilitation using elastic band exercise on performance-based function after THA.<sup>11</sup> The results from PHETHAS-1, as well as the current qualitative study PHETHAS-2, will be used to inform a future

large-scale trial on the effectiveness of rehabilitation exercise following THA compared to general physical activity.

## Theoretical framework

The study was inspired by critical psychology.<sup>12-14</sup> This approach was considered as a theoretical framework in which patient-perceived facilitators and barriers could be identified and as an approach by which we could elucidate how patients adapt HBRE and general PA to the complexity of their everyday lives. This approach assumes that the behavior of individuals is influenced by conditions that are either unchangeable or can be changed by the individual. People must constantly prioritize time and effort in their everyday lives to create balance and to ensure awareness of what is most important to them. These conditions can, for instance, be a lower level of functioning caused by osteoarthritis of the hip joint.

## Participants

Participants were recruited from Silkeborg Regional Hospital in the period January 2018 to May 2019. The inclusion criteria were adults > 18 years scheduled for a primary THA due to osteoarthritis. The participants should be able to understand written and spoken Danish. The exclusion criterion was referral to supervised rehabilitation in the municipality. We collected data based on interviews with 22 participants. Fourteen participants in PHETHAS-1 (P group) were purposeful sampled;<sup>15</sup> the remaining 8 participants recruited from patients in standard clinical practice (S group). The characteristics of the participants in PHETHAS-2 are illustrated in table 1.

Table 1. Characteristics of participants

|                                          | Participants sampled from standard clinical practice (n=8) | Participants sampled from PHETHAS-1* (n=14) | All participants (n=22) |
|------------------------------------------|------------------------------------------------------------|---------------------------------------------|-------------------------|
| Gender (female/male)<br>Number (percent) | 6/2 (75/25)                                                | 4/10 (29/71)                                | 10/12 (45/55)           |
| Age (years)<br>Median (range)            | 70 (42-82)                                                 | 69 (48-80)                                  | 69 (42-82)              |
| Retired (yes/no)<br>Number (percent)     | 5/3 (63/37)                                                | 10/4 (71/29)                                | 15/7 (68/32)            |

\* Pragmatic Home-based Exercise after Total Hip Arthroplasty – Silkeborg (PHETHAS-1) is a trial which investigated the preliminary efficacy of home-based rehabilitation using elastic band exercise on performance-based function after THA.

By gathering data from patients in both the P and the S groups, we sought to ensure data diversity and minimize the risk of gathering data from only the participants in PHETHAS-1 trial, a group who might be more motivated than the average because of their participation in the trial.

All participants underwent THA and were instructed in performing the same standard HBRE in their homes. The HBRE consists of unloaded exercises during the initial 3 postoperative weeks and strengthening exercises in the following 7 weeks. The strengthening exercises were hip abduction, flexion, and extension with elastic band resistance and sit-to-stand. The strengthening exercises were supplemented with daily stretching of hip flexor muscles and balance exercises. The details of this HBRE have been published previously.<sup>11</sup> The different pathways for the P and the S group are illustrated in table 2.

Table 2. Illustrating the two different pathways in this study (PHETHAS-2). PHETHAS-2 is a qualitative study embedded in a trial which investigated the preliminary efficacy of home-based rehabilitation using elastic band exercise on performance-based function after THA (PHETHAS-1).

| Time point and actions                                                                       | PHETHAS-2 pathways                                                                                                                                                                                                                                                                                         |                                                                                                                                                                                                                                                                                                            |
|----------------------------------------------------------------------------------------------|------------------------------------------------------------------------------------------------------------------------------------------------------------------------------------------------------------------------------------------------------------------------------------------------------------|------------------------------------------------------------------------------------------------------------------------------------------------------------------------------------------------------------------------------------------------------------------------------------------------------------|
|                                                                                              | Participants sampled from standard clinical practice (n=8)                                                                                                                                                                                                                                                 | Participants sampled from PHETHAS-1 (n=14)                                                                                                                                                                                                                                                                 |
| <b>Preoperative</b>                                                                          |                                                                                                                                                                                                                                                                                                            |                                                                                                                                                                                                                                                                                                            |
| Clinical examination at the outpatient clinic.                                               | <ul style="list-style-type: none"> <li>Information about surgery.</li> </ul>                                                                                                                                                                                                                               | <ul style="list-style-type: none"> <li>Information about surgery.</li> </ul>                                                                                                                                                                                                                               |
| Educational class                                                                            | <ul style="list-style-type: none"> <li>An interdisciplinary team of health professionals explained the perioperative pathway i.e. procedures of anesthesia, surgery, rehabilitation, postoperative movement restrictions and expected postoperative pain and management.</li> </ul>                        | <ul style="list-style-type: none"> <li>An interdisciplinary team of health professionals explained the perioperative pathway i.e. procedures of anesthesia, surgery, rehabilitation, postoperative movement restrictions and expected postoperative pain and management.</li> </ul>                        |
| <b>During admission</b>                                                                      |                                                                                                                                                                                                                                                                                                            |                                                                                                                                                                                                                                                                                                            |
| Physiotherapy                                                                                | <ul style="list-style-type: none"> <li>Mobilization</li> <li>Instructed in unloaded exercises</li> <li>Instructed in movement restrictions and recommendations on physical activity.</li> <li>Evaluation of need for supervised rehabilitation.</li> </ul>                                                 | <ul style="list-style-type: none"> <li>Mobilization</li> <li>Instructed in unloaded exercises</li> <li>Instructed in movement restrictions and recommendations on physical activity.</li> <li>Evaluation of need for supervised rehabilitation.</li> </ul>                                                 |
| <b>Postoperative follow up</b>                                                               |                                                                                                                                                                                                                                                                                                            |                                                                                                                                                                                                                                                                                                            |
| Phone call performed by a nurse 1 week postoperative.                                        | <ul style="list-style-type: none"> <li>Check up on physical and mental well-being.</li> </ul>                                                                                                                                                                                                              | <ul style="list-style-type: none"> <li>Check up on physical and mental well-being.</li> </ul>                                                                                                                                                                                                              |
| Clinical follow up, at the hospital, performed by a physiotherapist 3-4 weeks after surgery. | <ul style="list-style-type: none"> <li>Evaluation of need for supervised rehabilitation.</li> <li>Instructed in strengthening exercises.</li> <li>Advised to gradually increase their activity level.</li> <li>Instructions in how to handle pain during exercises and recreational activities.</li> </ul> | <ul style="list-style-type: none"> <li>Evaluation of need for supervised rehabilitation.</li> <li>Instructed in strengthening exercises.</li> <li>Advised to gradually increase their activity level.</li> <li>Instructions in how to handle pain during exercises and recreational activities.</li> </ul> |

|                                                                                                |                                                                                                                                                                       |                                                                                                                                                                                                                                                                                                                                                                                                                                               |
|------------------------------------------------------------------------------------------------|-----------------------------------------------------------------------------------------------------------------------------------------------------------------------|-----------------------------------------------------------------------------------------------------------------------------------------------------------------------------------------------------------------------------------------------------------------------------------------------------------------------------------------------------------------------------------------------------------------------------------------------|
|                                                                                                | <ul style="list-style-type: none"> <li>Recommended to comply with the recommendations on physical activity from the Danish Health and Medicines Authority.</li> </ul> | <ul style="list-style-type: none"> <li>Recommended to comply with the recommendations on physical activity from the Danish Health and Medicines Authority.</li> <li>Baseline measurements* are performed by a research assistant.</li> <li>Instructed in use of equipment that measures their training and activities.</li> <li>Instructed to register pain level and performed home exercises and physical activities in a diary.</li> </ul> |
| Clinical follow up, at the hospital, performed by a research assistant 10 weeks postoperative. |                                                                                                                                                                       | <ul style="list-style-type: none"> <li>Follow up measurements*</li> </ul>                                                                                                                                                                                                                                                                                                                                                                     |

\*Following outcomes were measured: 40-m fast-paced walk test, Hip disability and Osteoarthritis Outcome Score, 30-s chair stand test, Hip muscle strength, adverse events, evaluation of prescribed exercises, change in hip problems, perceptions of result after surgery.

## Data collection

We conducted 22 interviews to gain an in-depth knowledge about patient-perceived facilitators and barriers to HBRE and general PA after THA.<sup>16</sup> The interviews were guided by a semi-structured guide with open-ended questions followed by exploring questions with the purpose of gaining more detailed information.<sup>16,17</sup> The semi-structured interview guide was informed by existing knowledge in the field of THA and critical psychology. The questions focused mainly on perceptions of facilitators and barriers related to HBRE and general PA after THA. The interview guide is added as appendix 1. Theoretical sampling guided the data collection which entailed concurrent data analysis as the basis for further data.<sup>18</sup> The interviews were conducted 10 weeks postoperatively, reflecting the time at which there was a follow-up in the PHETHAS-1 trial.



The participants enrolled in PHETHAS-1 were interviewed individually, and the interview took place in undisturbed meeting rooms at the hospital at the time of the 10-week follow-up. For the participants who received standard treatment, the interviews took place in their own homes. The interviews lasted an average of 43 minutes (20–67 minutes) and were conducted by the first and fifth author who both hold a master's degree and have experience with the method used.

## Data analysis

Data were thematically analyzed.<sup>19,20</sup> Verbatim transcripts were made of audio-recorded interviews. Transcripts were manually coded by the first and fifth author in an ongoing process. The initial analysis alternated between coding word-by-word, line-by-line, and incident-by-incident, and codes and data were constantly compared, e.g. preferences related to activity. Through this initial process, preliminary categories were constructed. Focused coding succeeded initial coding in an emergent process. At this point, we decided on the thematic structure and themes that were sufficient to give a rich description of facilitators and barriers in relation to HBRE and general PA after THA. To systematize the coding process the analysis was supported by the NVivo 12 software.<sup>21</sup>

## Ethics

The first and fifth author obtained informed consent from the participants.

The study complies with the declaration of Helsinki<sup>22</sup> and received approval from The Ethics Committee of Central Denmark Region. The study was approved by the Danish Data Protection Agency (ref. no: 1-16-02-589-15).

## Findings

During the thematic analysis, 7 interrelated themes emerged regarding facilitators and barriers related to HBRE and general PA after THA. The main facilitator emerged as an overall theme of “Return to the well-known everyday life.” This main theme is elaborated on below together with the subthemes about facilitators and barriers. The facilitators were “A natural orientation toward general physical activity,” “Interaction with nature,” and “An obligation to health professionals and to oneself.” The barriers emerged as “Pain,” “Boring exercises,” and “A feeling of distant rehabilitation.”

### Return to the well-known everyday life

For all participants, the overall goal was to reach a level of functioning equivalent to the life they lived before the hip restricted their functioning, and therefore they focused on skills necessary to regain that level. HBRE was used as a means of reaching this goal.

#### *A natural orientation toward general physical activity*

All participants expressed awareness toward general PA and were oriented toward the kind of activities they used to enjoy doing before the hip restricted their functioning. They were naturally drawn toward the activities needed to return to the preferred way of living their everyday lives. All participants favored general PA over HBRE. For most of the participants, HBRE were performed with the purpose of being able to perform the preferred general PA:

I´d rather do all the normal activities. Go for long walks or something. That´s what I prefer. And then I do the exercises to get to it. (S)

If the participant was used to playing golf, attention was directed toward being able to walk a certain distance in accordance with the requirements for playing golf:

I'd like to be able to function like I usually do. After I became a pensioner, golf has been a big part of my life. So, the thing is to get back on the golf course when the season starts, that's the litmus test. If I can do it, then I won't complain. (P)

Likewise, if the participant lived alone in a house with stairs, the attention was directed toward rehabilitation that enabled the participant to go up and down stairs. They used the previous level of functioning as a point of orientation to assess whether the goal of rehabilitation was achieved and whether they were able to perform the same kind of activities as they could before their hip restricted their functioning:

Most of all, I just want to be able to be active together with my family. That's what was most important in the end. Like it was 5 years ago, I want to be able to work hard in the garden. Like 15 years ago, I would like to be able to go for a walk and like 40 years ago, I would like to be able to play soccer. But it is true that when you've had a condition for a long time, abilities keep disappearing. (P)

## Interaction with Nature

For most participants, interaction with nature seemed to be a facilitating factor for general PA and the participants were drawn to activities outdoors. However, the seasons affected the extent to which they found it possible to perform outdoor activities:

Well, it was a horrible winter. Then it was slippery and then there was snow. When the wind's blowing and it's cold and the light's dim, then it is not tempting to go for a walk. (P)

## An obligation to health professionals and to oneself

Another facilitating factor was a feeling of an external obligation toward the health professionals and an internal obligation toward what was perceived as best for oneself. The external obligation was reinforced by ongoing contact with health professionals during the period of rehabilitation. The participants described the feeling of a committed collaboration with health professionals as facilitating because it made them want to do their part of the job and motivated them to perform well during the rehabilitation. HBRE was experienced as a duty they performed partly for their own sake and partly for the sake of the health professionals. The participants had a desire to be good patients who were doing well:

You train for your own sake, but you also train a little for the sake of the system to pay back all the good people who paid for your surgery. (P)

Participating in the PHETHAS-1 trial was facilitating in itself because it was experienced as a structured and binding collaboration. All participants were happy to be a part of the PHETHAS-1 trial because it made them do the exercises:

That's why I said yes to being part of the project ... because I knew I would be more disciplined and get the training done. And I could also see that, because I hadn't trained that much after the last surgery as I probably should have. (P)

## Pain

Those participants who experienced a great deal of pain after the THA described pain as a barrier to both general PA and HBRE. A great deal of hip pain affected the ability to determine the proper amount and intensity of general PA and whether it was wise to continue HBRE:

I think the challenge all along has been how much must it hurt. You also have to reach that point, because otherwise it won't help. But where that point is, if you're in pain, I think that has been difficult. (P)

Paradoxically, when a participant experienced only a little pain it could give the impression that HBRE was not necessary at all:

When you get out of bed 3 hours after the surgery and walk and bike and climb stairs and go all the way down the hall and back again and you notice nothing. Then you say to yourself that you are ok and then you really have to go along and do the exercises, because you already feel that you can do it all. (P)

## Boring exercises

A barrier to performing the HBRE was a feeling of boredom compared to general PA. HBRE was experienced as boring in different ways:

I think the exercises are a little hard to get through. If you walk and bike, you have a goal and it's a little easier than doing exercises that are all the same. (P)

If the exercise load was too low, it became tedious:

It's been too easy. I was tired of it for a while because I didn't feel like it was doing me any good. (P)

The exercises in HBRE should be performed with slow movements, which gave the impression that they were time-consuming and boring:

You have to do the exercises slowly, so you really feel that they take a long time. (P)

## A feeling of distant rehabilitation

Another barrier was that some participants experienced HBRE as being impersonal compared to real human contact:

It is such a strange mechanism, but if the health professionals are distant it is not as motivating as if you see them occasionally and could ask questions. It seems so distant. It contains a lot of psychological mechanisms. (P)

I might have needed a physiotherapist to look at my walking ability at some point. And maybe also check if I did the exercises right. Because you can very easily start off and do them the wrong way. (S)

Some participants expressed their concern about elderly patients living alone, indicating that this group, in particular could need contact with health professionals. Other participants suggested that a phone call from the health professionals would have made a difference.

## **Discussion**

The aim of this study was to explore patient-perceived facilitators and barriers to HBRE and general PA after THA. HBRE is performed unsupervised, which means that the patients themselves are responsible for performing the recommended exercises. The patients are expected to implement HBRE in their everyday lives; hence we applied a theoretical perspective with attention to everyday life rooted in critical psychology.<sup>23</sup>

Findings from our study indicated that the greatest facilitator of HBRE was participants' aim to return to everyday life as it was before their hip restricted their functioning. If the participants perceived HBRE as a way of realizing this aim, they were motivated to implement it in their everyday lives for a short period. This is consistent with how Dreier outlines components of everyday life as being composed of a considerable number of complex individual and interrelated

societal components, which are constantly competing.<sup>23</sup> Based on, e.g., their previous experiences, their state of mind, and their social context, the individual patient will measure HBRE against the necessity of performing the HBRE and what they appraise as being important to them in their everyday lives.

We found that the absence of contact with health professionals was described by some participants as rehabilitation at a distance and perceived as a barrier. It appeared as if the P group, who had an additional clinical visit 10 weeks postoperatively, were more engaged and showed a greater adherence to HBRE. This finding may indicate that contact with health professionals has an impact and is important regarding engagement and adherence. This notion is supported by another finding in this study, namely that participants expressed an obligation toward health care professionals, and therefore performed the exercises partly for the sake of the health care professionals. According to Dreier, the participant's adherence to HBRE is not simply a matter of obligations or how time is spent or a question of lifestyle. It is also influenced by other conditions in the participant's life and whether the participant considers HBRE as implementable in his/her everyday life.<sup>23</sup> From this perspective, HBRE is not continuously on the patients' minds but exists among all the other things that are already ongoing in an everyday life, where several events take place simultaneously and compete for attention and time. The participants prioritized everything that was going on in their everyday lives, and adherence to HBRE is dependent on the participants being aware of what is most important.

The importance of the interaction between patient and health care professionals in rehabilitation is dealt with in a qualitative systematic review that explores the views of adult patients prescribed therapy-based exercise.<sup>24</sup> This review concludes that although participants referred to the value of



peers and family, the greatest importance was placed on the therapist. The interaction between therapists and patients appeared integral for engagement and adherence to rehabilitation exercise programs.<sup>24</sup> The engagement and support of health professionals resonates across the evidence regarding possible facilitators for physical activity.<sup>25-27</sup>

We found that the availability of health care professionals matters to patients, and when performing an unsupervised HBRE, there are fewer opportunities to clarify issues like pain. Even though the health care system supports self-management, it can be difficult to implement. A new Danish study showed that patients after discharge from hospital have a feeling of insecurity and of being left alone, which may affect the ability to manage pain and recovery after surgery.<sup>28</sup> Furthermore, this is consistent with a study describing challenges faced by patients and their families during a transition from hospital to home, which shows how gaps in medical knowledge, in resources needed to care for one's health, and in self-efficacy prevent effective self-management when patients leave the hospital setting.<sup>29</sup> These findings suggest the need for continued postoperative follow-up and guidance for patients, which is in accordance with other studies that deal with rehabilitation from the patients' point of view. These studies indicate that guidance from physiotherapists is an important part of patients' recovery.<sup>30</sup> Several studies conclude that more individual and customized information and guidance would be appropriate for patients before discharge<sup>24,28,31</sup> and the facilitating of physical activity.<sup>32</sup>

Another finding in our study indicated that the participants were more motivated to resume general PA rather than HBRE because they had a natural orientation toward it and valued undertaking general PA that they had selected themselves rather than predefined rehabilitation exercises. All participants expressed awareness of general PA and were oriented toward the kind of activities they

used to enjoy doing before the hip restricted their functioning. They used the previous level of functioning as a point of orientation to assess whether they could perform the same kind of activities as they had before. This finding of a desire to reach the previous level of functioning has previously been reported in another study that concluded that patients have little interest in actually undertaking greater levels of physical activity for either pleasure or health gains than they had before the hip restricted their functioning.<sup>33</sup> This is consistent with our finding that the participants aiming at returning to the well-known everyday life.

## Limitations and strengths

To increase credibility, we used triangulation, and the interviews were conducted and analyzed by 2 different persons.<sup>34</sup> Yet the findings were similar, which we consider a strength of the study. In relation to obtaining diversity in the sample of participants, it is considered a strength that participants were recruited from among both PHETHAS-1 trial participants and the population of standard clinical practice not involved in an exercise trial. There may be additional contributing factors in relation to patients' perceptions of facilitators and barriers to HBRE and general PA after THA such as age, gender, and culture.

Participants who agreed to participate in the interviews may have been more motivated for HBRE than the average patient, which is a weakness of the study.

## Implications

The findings of this study indicate that future rehabilitation after THA could be organized with an emphasis on the preferred general PA of each patient. Patients engage and adhere to HBRE to varying degrees' dependent on several components of their everyday lives but in general 6 implications for clinical practice appeared.

- Rehabilitation must be based on the individual preferences of each patient regarding general PA.
- Pain is a barrier to performing HBRE due to uncertainty as to whether performing an exercise is harmful; therefore, awareness of this group is important.
- No pain is a barrier to performing HBRE due to the perception that it does not seem to be necessary if there is no pain; therefore, awareness on this group is important.
- HBRE can be perceived as tedious and time-consuming.
- Contact with health professionals has an impact and is important regarding engagement in and adherence to HBRE.
- Interaction with nature is a facilitator for general PA and must be taking into consideration when patients undergo surgery during the winter or fall in Northern European countries.

## Unanswered questions and needs for future research

We do not know whether HBRE are more effective than general PA; therefore, the need to perform HBRE should be the subject of future research.

The participants had a desire to return to their individual everyday lives which speaks in favor of general PA. The participants also described the absence of supervision by health care professionals as causing a feeling of being left alone, which speaks for supervised rehabilitation exercise. For this reason, the balance between general PA, HBRE and supervised rehabilitation could be a subject for future research.

## Conclusion

This study contributes to an understanding of HBRE and general PA after THA from the perspective of the patients.

Everyday life was of great importance for the participants, and they express a desire to return to their everyday life as it was before their hips restricted their functioning. It is important to the participants to acquire the skills that enable them to perform the activities necessary to return to everyday life, and HBRE was used as a means of reaching this goal.

Contact with health professionals has a beneficial impact on the participants' adherence to HBRE because being a part of a committed collaboration is facilitating. HBRE can be perceived as boring, and general PA as being more interesting. Thus, in the future rehabilitation after THA could be organized with an emphasis on general PA. All participants favored general PA over HBRE, and for most of the participants, HBRE were performed with the purpose of being able to perform the preferred general PA.

## References

1. The Danish Hip Arthroplasty Register (DHR). National Annual Report Web site. <http://danskhoftaaloplastikregister.dk/wp-content/uploads/2019/09/DHR-årsrapport-2019-til-offentliggørelse-1.pdf>. Published 2019. Updated June 19, 2019. Accessed August 8, 2019.
2. Kehlet H. Fast-track hip and knee arthroplasty. *The Lancet*. 2013;381(9878):1600-1602.
3. Jung KD, Husted H, Kristensen BB. [Total knee and hip arthroplasty within 2 days : The Danish Fast-Track Model]. *Orthopæde*. 2019.
4. Hansen S, Aaboe J, Mechlenburg I, Overgaard S, Mikkelsen LR. Effects of supervised exercise compared to non-supervised exercise early after total hip replacement on patient-reported function, pain, health-related quality of life and performance-based function – a systematic review and meta-analysis of randomized controlled trials. *Clinical Rehabilitation*. 2018;33(1):13-23.
5. Coulter CL, Scarvell JM, Neeman TM, Smith PN. Physiotherapist-directed rehabilitation exercises in the outpatient or home setting improve strength, gait speed and cadence after elective total hip replacement: a systematic review. *Journal of Physiotherapy*. 2013;59(4):219-226.
6. Strickland LH, Kelly L, Hamilton TW, Murray DW, Pandit HG, Jenkinson C. Early recovery following lower limb arthroplasty: Qualitative interviews with patients undergoing elective hip and knee replacement surgery. Initial phase in the development of a patient-reported outcome measure. *Journal of Clinical Nursing*. 2018;27(13-14):2598-2608.
7. Jan M-H, Hung J-Y, Lin JC-H, Wang S-F, Liu T-K, Tang P-F. Effects of a home program on strength, walking speed, and function after total hip replacement. *Archives of Physical Medicine and Rehabilitation*. 2004;85(12):1943-1951.
8. Dreyer O. *Psychotherapy in everyday life*. Cambridge University Press; 2008.
9. NCBI. MeSH. PubMed. <https://www.ncbi.nlm.nih.gov/mesh/?term=exercise+therapy>. Accessed aug., 2019.
10. WHO. Physical Activity. Fact sheet N385. WHO. [http://www.salute.gov.it/imgs/C\\_17\\_pubblicazioni\\_2177\\_ulterioriallegati\\_ulterioreallegato\\_0\\_alleg.pdf](http://www.salute.gov.it/imgs/C_17_pubblicazioni_2177_ulterioriallegati_ulterioreallegato_0_alleg.pdf). Published 2014. Accessed August, 2019.
11. Mikkelsen L, Madsen M, Rathleff M, et al. Pragmatic Home-Based Exercise after Total Hip Arthroplasty - Silkeborg: Protocol for a prospective cohort study (PHETHAS-1) [version 1; peer review: 3 approved]. *F1000Research*. 2019;8(965).

12. Holzkamp K. Mennesket som subjekt for videnskabelig metodik. *Nordiske udkast*. 2005;33(2):5-33.
13. Dreier O. Læring som ændring af personlig deltagelse i sociale kontekster. In: Nielsen K, Steinar K, eds. *Mesterlære, Læring som social praksis*. 2nd ed. Kbh.: Hans Reitzels Forlag; 1999:76-99.
14. Dreier O. Intervention, evidensbaseret forskning og dagligliv. *Nordiske udkast*. 2014;42(1):5-16, 60.
15. Patton MQ. Designing Qualitative Studies. Purposeful Sampling. In: Patton MQ, ed. *Qualitative evaluation and research methods*. 2th ed. Beverly Hills: Sage; 1990:169-186.
16. Kvale S, Brinkmann S. *Interview : det kvalitative forskningsinterview som håndværk*. 3th ed. Kbh.: Hans Reitzel; 2015.
17. Brinkmann S. Forskningsdesign i interviewundersøgelser. In: Brinkmann S, ed. *Det kvalitative interview*. 1rd ed. København: Hans Reitzels Forlag; 2014:67-108.
18. Charmaz K. Theoretical Samling, Saturation, and Sorting. In: Charmaz K, ed. *Constructing Grounded Theory*. 2rd ed.: SAGE; 2014:192-224.
19. Braun V, Clarke V. Using thematic analysis in psychology. *Qualitative Research in Psychology*. 2006;3(2):77-101.
20. Clarke V, Braun V. Thematic Analysis. In: Michalos AC, ed. *Encyclopedia of Quality of Life and Well-Being Research*. Dordrecht: Springer Netherlands; 2014:6626-6628.
21. QSR. NVivo qualitative data analysis software. Version 12. Pty Ltd. Published 2018. Accessed.
22. WMA declaration of Helsinki - Ethical principles for medical research involving human subjects. World Medical Association. <https://www.wma.net/policies-post/wma-declaration-of-helsinki-ethical-principles-for-medical-research-involving-human-subjects/> Published 2013. Accessed November 6, 2019.
23. Dreier O. Personality and the conduct of everyday life. *Nordic Psychology*. 2011;63(2):4-23.
24. Davenport S, Dickinson A, Minns Lowe C. Therapy-based exercise from the perspective of adult patients: a qualitative systematic review conducted using an ethnographic approach. *Clinical Rehabilitation*. 2019:0269215519868797.
25. Woolhead GM, Donovan JL, Dieppe PA. Outcomes of total knee replacement: a qualitative study. *Rheumatology*. 2005;44(8):1032-1037.

26. Gustafsson BÅ, Ponzer S, Heikkilä K, Ekman S-L. The lived body and the perioperative period in replacement surgery: older people's experiences. *Journal of Advanced Nursing*. 2007;60(1):20-28.
27. JACOBSON AF, MYERSCOUGH RP, DELAMBO K, et al. Patients' Perspectives on Total Knee Replacement. *AJN The American Journal of Nursing*. 2008;108(5):54-63.
28. Specht K, Agerskov H, Kjaersgaard-Andersen P, Jester R, Pedersen BD. Patients' experiences during the first 12 weeks after discharge in fast-track hip and knee arthroplasty – a qualitative study. *International Journal of Orthopaedic and Trauma Nursing*. 2018;31:13-19.
29. Pollack AH, Backonja U, Miller AD, et al. Closing the Gap: Supporting Patients' Transition to Self-Management after Hospitalization. *Proceedings of the SIGCHI conference on human factors in computing systems CHI Conference*. 2016;2016:5324-5336.
30. Webster F, Bremner S, Katz J, et al. Patients' perceptions of joint replacement care in a changing healthcare system: a qualitative study. *Healthcare policy = Politiques de sante*. 2014;9(3):55-66.
31. Sjøveian AKH, Leegaard M. Hip and knee arthroplasty - patient's experiences of pain and rehabilitation after discharge from hospital. *International Journal of Orthopaedic and Trauma Nursing*. 2017;27:28-35.
32. Webster F, Perruccio AV, Jenkinson R, et al. Understanding why people do or do not engage in activities following total joint replacement: a longitudinal qualitative study. *Osteoarthritis and Cartilage*. 2015;23(6):860-867.
33. Smith TO, Latham S, Maskrey V, Blyth A. Patients' perceptions of physical activity before and after joint replacement: a systematic review with meta-ethnographic analysis. *Postgraduate Medical Journal*. 2015;91(1079):483.
34. B. H. Triangulering - metoderedskab og validitetsinstrument. In: IM. L, P. R, eds. *Humanistisk forskning indenfor sundhedsvidenskab*. København: Akademisk forlag; 1995:329-338.

Appendix 1.

## Interview guide

### Introduction

- Tell a little about yourself: education, work life, leisure time, marital status

The interviewer presents the Timeline (a piece of paper with the illustration below)

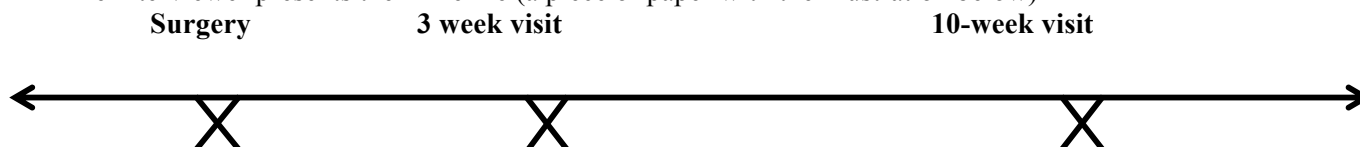

### Questions asked while using the timeline

- What did your hip problems prevent you from doing?
- On a scale from 0 to 10, where 10 is best, how was your functional status just before the operation?
- Why was it like that?
- Where are you on that scale now?
- Where you nervous before the operation?
- Do you know anyone who has undergone hip surgery?
- What is your goal?

### Questions concerning exercise and physical activity

- Which recommendations have you received concerning training from the physiotherapist (staff)?
- Tell me about how it was for you to perform the training at home just after discharge from the hospital?
- How was it to perform the training at home after the 3 week visit at the Hospital?
- Did you feel sufficiently informed/capable to independently conduct the training at home?
- Tell me how you do in practice when you exercise at home?
- What do you think about the exercise diary?
- How did it feel to train to "tiring out"?
- Besides from the prescribed exercises, do you perform any other physical activity during the day? (e.g. biking, walking).  
(Explore patient preferences for physical activity versus exercise)
- Have you had periods where it was difficult to exercise/where you did not perform exercises?
- How important is it for you to be able to be physically active?
- Have you considered not to be physically active/perform the exercises?
- Have you considered when you will quit the exercise program?
- Have you considered if you wish to continue to exercise and how you will do it?

-----  
Supplementary question

- We are considering to investigate whether this exercise program works better than general physical activities, what do you think of this idea?
